# Supplementary material for: Association between polycyclic aromatic hydrocarbon exposure and cognitive performance in older adults: a cross-sectional study from NHANES 2011–2014
Source: Royal Society of Chemistry journal article supplement (doi:10.1039/d4em00290c), 2024-01-01
Supplement: d4em00290c1.pdf [file d4em00290c1.pdf]

**Associations between polycyclic aromatic hydrocarbon exposure and  
cognitive performance in older adults: a cross-sectional study from  
NHANES 2011-2014**

Zerong Guan<sup>a#</sup>, Xueqiong Weng<sup>b#</sup>, Ligang Zhang<sup>c</sup>, Peiran Feng<sup>a,d\*</sup>

<sup>a</sup>The First Affiliated Hospital, Jinan University, Guangzhou 510630, China

<sup>b</sup>JC School of Public Health and Primary Care, The Chinese University of Hong  
Kong, Hong Kong SAR, China

<sup>c</sup>School of Medicine, Foshan University, Foshan 528225, China

<sup>d</sup>The Fifth Affiliated Hospital (Heyuan Shenhe People's Hospital), Jinan University,  
Heyuan 517000, China

<sup>#</sup>Zerong Guan and Xueqiong Weng contributed to this article equally.

\*Correspondence: Peiran Feng (P-R.F, fengpr@jnu.edu.cn)

Tel: +86-15711937223 (P-R.F)

## Supplemental Files

**Table S1.** Distribution of PAH metabolites (N=772), NHANES, USA, 2011-2014.

**Table S2.** BKMR models of group inclusion and conditional inclusion for posterior inclusion probabilities (PIPs).

**Table S3.** The estimated differences and their 95% CIs of specific percentile.

**Fig.S1** Directed acyclic graph of hypothesized associations between PAHs exposures and cognitive function.

**Fig.S2** Pearson correlation coefficients among 5 PAH metabolites (N=772), NHANES, USA, 2011-2014.

**Fig.S3** Association between weighted OH-PAHs and the z-score of IRT, DRT, AFT, DSST.

**Table S1** Distribution of PAHs metabolites (N=772), NHANES, USA, 2011-2014.

| PAH<br>( $\mu\text{g/L}$ ) | Detection<br>frequency | GM   | Mean  | Percentile |      |      |      |       |
|----------------------------|------------------------|------|-------|------------|------|------|------|-------|
|                            |                        |      |       | 5th        | 25th | 50th | 75th | 95th  |
| 1-NAP                      | 99.74%                 | 1.83 | 46.29 | 0.26       | 0.70 | 1.41 | 3.49 | 21.87 |
| 2-NAP                      | 100.00%                | 3.41 | 6.74  | 0.56       | 1.48 | 3.42 | 7.41 | 21.82 |
| 3-FLUO                     | 96.37%                 | 0.07 | 0.16  | 0.01       | 0.03 | 0.06 | 0.13 | 0.66  |
| 2-FLUO                     | 100.00%                | 0.17 | 0.35  | 0.03       | 0.08 | 0.15 | 0.31 | 1.25  |
| 1-PHEN                     | 99.22%                 | 0.10 | 0.16  | 0.02       | 0.06 | 0.10 | 0.18 | 0.46  |

**Table S2** BKMR models of group inclusion and conditional inclusion for posterior inclusion probabilities (PIPs).

| OH-PAHs | Group | IRT z-score |         | DRT z-score |         | AFT z-score |         | DSST z-score |         |
|---------|-------|-------------|---------|-------------|---------|-------------|---------|--------------|---------|
|         |       | groupPIP    | condPIP | groupPIP    | condPIP | groupPIP    | condPIP | groupPIP     | condPIP |
| 1-NAP   | 1     | 0.177       | 1.000   | 0.115       | 1.000   | 0.5697      | 1.000   | 0.426        | 1.000   |
| 2-NAP   | 2     | 0.193       | 1.000   | 0.154       | 1.000   | 0.599       | 1.000   | 0.717        | 1.000   |
| 3-FLUO  | 3     | 0.633       | 0.224   | 0.723       | 0.322   | 0.703       | 0.500   | 0.545        | 0.621   |
| 2-FLUO  | 3     | 0.633       | 0.776   | 0.723       | 0.678   | 0.703       | 0.500   | 0.545        | 0.379   |
| 1-PHEN  | 4     | 0.272       | 1.000   | 0.113       | 1.000   | 0.601       | 1.000   | 0.355        | 1.000   |

Note: adjusting for age, gender, race, education, family PIR, physical activity, serum cotinine, alcohol drinking, stroke, diabetes, hypertension, BMI and urinary creatinine. IRT, Immediate Recall test; DRT, Delayed Recall test; AFT, Animal Fluency test; DSST, Digit Symbol Substitution test.

**Table S3** The estimated differences and their 95% CIs of specific percentile

| Percentile | IRT z-score   |                      | DRT z-score  |                    | AFT z-score |              | DSST z-score  |                      |
|------------|---------------|----------------------|--------------|--------------------|-------------|--------------|---------------|----------------------|
|            | Est           | 95% CI               | Est          | 95% CI             | Est         | 95% CI       | Est           | 95% CI               |
| 25th       | 0.046         | -0.016~0.107         | <b>0.064</b> | <b>0.001~0.126</b> | 0.004       | -0.039~0.048 | <b>0.057</b>  | <b>0.000~0.114</b>   |
| 30th       | 0.035         | -0.012~0.081         | 0.045        | -0.002~0.092       | 0.003       | -0.031~0.037 | <b>0.045</b>  | <b>0.003~0.088</b>   |
| 35th       | 0.022         | -0.011~0.055         | 0.029        | -0.005~0.063       | 0.003       | -0.022~0.027 | <b>0.035</b>  | <b>0.005~0.065</b>   |
| 40th       | 0.009         | -0.016~0.033         | 0.013        | -0.012~0.038       | 0.002       | -0.015~0.019 | <b>0.028</b>  | <b>0.005~0.051</b>   |
| 45th       | 0.004         | -0.008~0.017         | 0.004        | -0.009~0.017       | 0.001       | -0.008~0.010 | <b>0.012</b>  | <b>0.001~0.023</b>   |
| 50th       | 0.000         | 0.000~0.000          | 0.000        | 0.000~0.000        | 0.000       | 0.000~0.000  | 0.000         | 0.000~0.000          |
| 55th       | <b>-0.013</b> | <b>-0.025~-0.001</b> | -0.012       | -0.024~0.001       | 0.000       | -0.009~0.008 | -0.009        | -0.020~0.001         |
| 60th       | -0.023        | -0.049~0.003         | -0.019       | -0.046~0.007       | -0.002      | -0.021~0.018 | <b>-0.026</b> | <b>-0.050~-0.003</b> |
| 65th       | -0.029        | -0.066~0.008         | -0.023       | -0.061~0.014       | -0.002      | -0.031~0.026 | <b>-0.039</b> | <b>-0.072~-0.006</b> |
| 70th       | -0.032        | -0.083~0.018         | -0.027       | -0.078~0.025       | -0.003      | -0.041~0.034 | <b>-0.056</b> | <b>-0.101~-0.010</b> |
| 75th       | -0.045        | -0.112~0.022         | -0.033       | -0.101~0.035       | -0.005      | -0.054~0.045 | <b>-0.075</b> | <b>-0.134~-0.016</b> |

Note: adjusting for age, gender, race, education, family PIR, physical activity, serum cotinine, alcohol drinking,

stroke, diabetes, hypertension, BMI and urinary creatinine. IRT, Immediate Recall test; DRT, Delayed Recall

test; AFT, Animal Fluency test; DSST, Digit Symbol Substitution test.

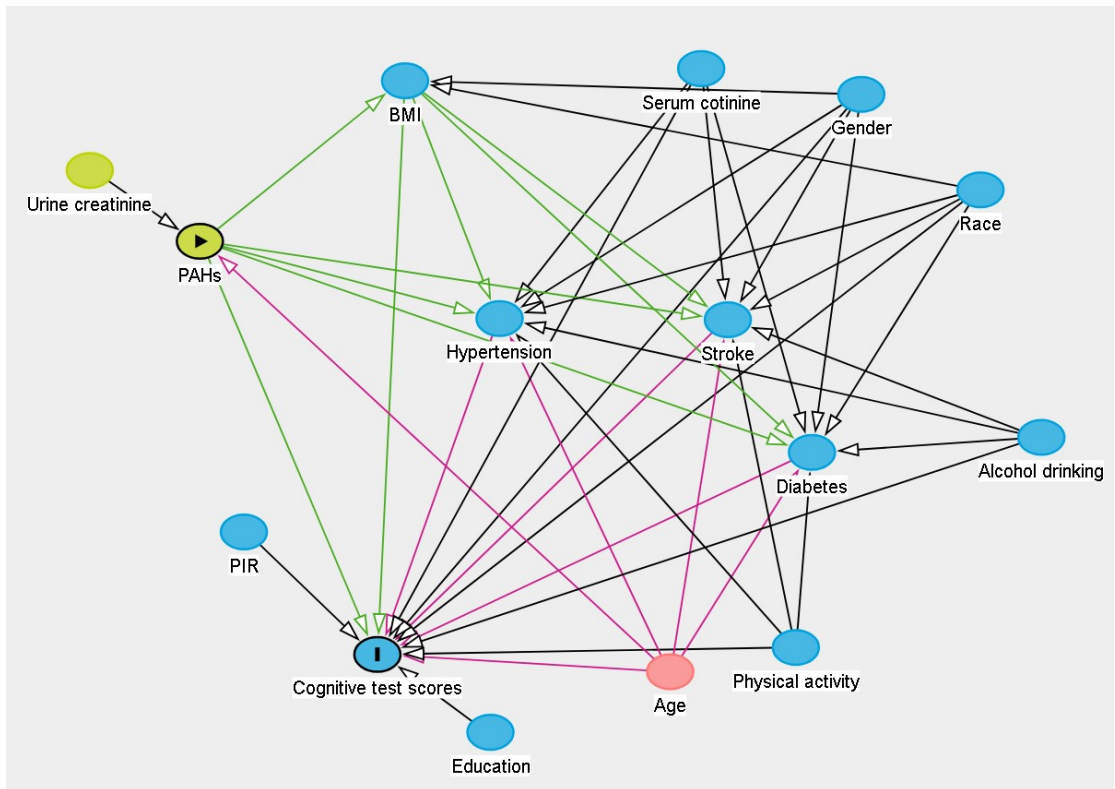

● exposure   
 ● outcome   
 ● ancestor of exposure   
 ● ancestor of outcome  
● ancestor of exposure *and* outcome   
— causal path   
— biasing path

**Fig S1.** Directed acyclic graph of hypothesized associations between PAHs exposures and cognitive function.

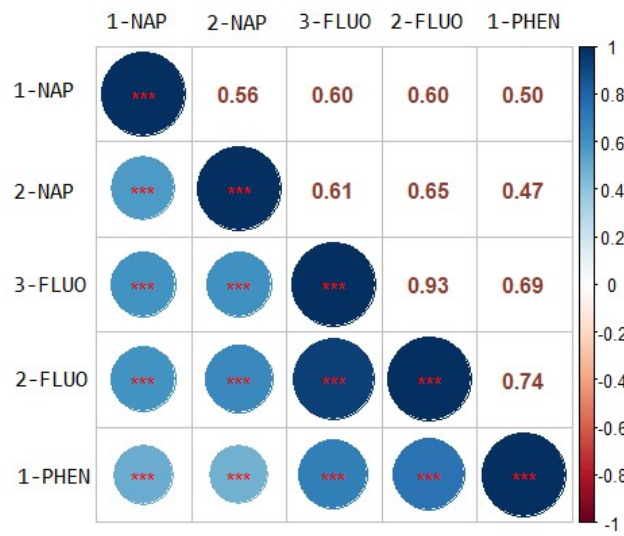

Fig.S2 Pearson correlation coefficients among 5 PAHs metabolites (N=772), NHANES, USA, 2011-2014. \*

P < 0.05; \*\*, P < 0.01; \*\*\*, P < 0.001.

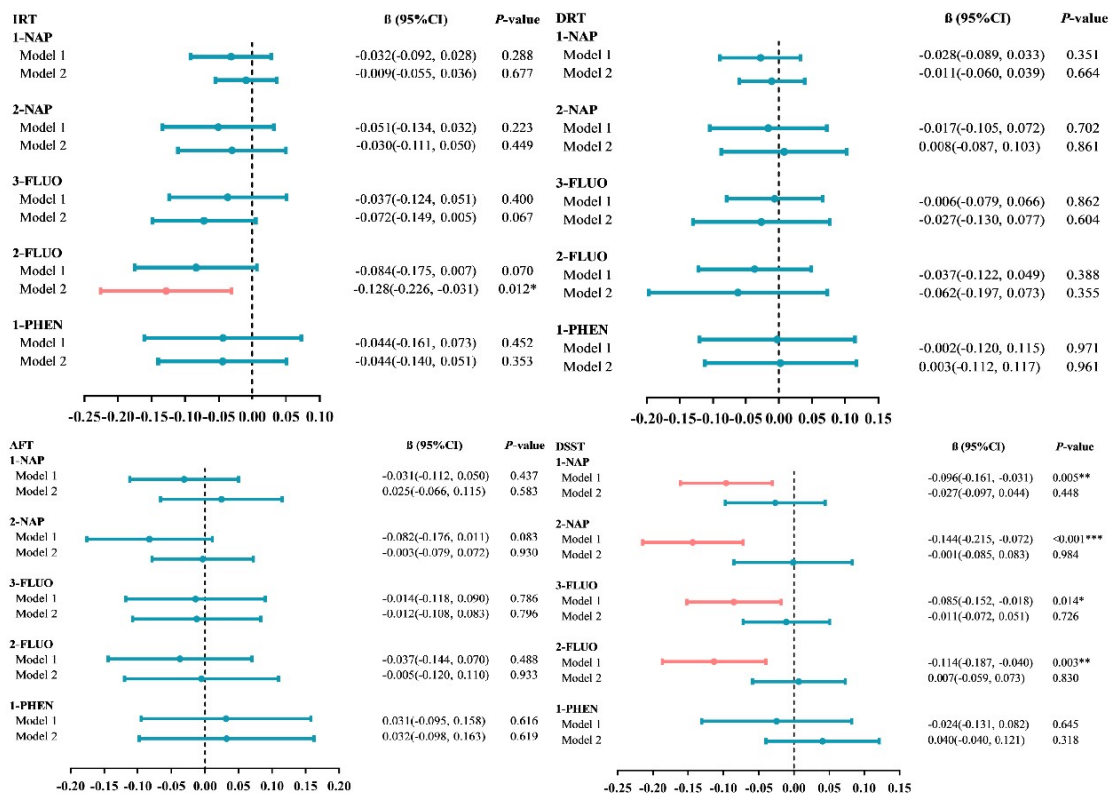

**Fig.S3** Association between weighted OH-PAHs and the z-score of IRT, DRT, AFT, DSST. Model 1: unadjusted model. Model 2: adjusted for age, gender, race, education, family PIR, physical activity, serum cotinine, alcohol drinking, stroke, diabetes, hypertension, BMI, and urinary creatinine. \*,  $P < 0.05$ ; \*\*,  $P < 0.01$ ; \*\*\*,  $P < 0.001$ . IRT, Immediate Recall test; DRT, Delayed Recall test; AFT, Animal Fluency test; DSST, Digit Symbol Substitution test.
